# Supplementary material
Source: MDPI journal article supplement (https://www.mdpi.com/2075-4698/13/9/200)
Supplement: s1 [file s1]

## **SUPPLEMENTARY MATERIAL**

Descriptive Statistics and Linear Mixed Models (LMM) fit comparisons

Descriptive statistics for municipality characteristics ( $n = 253$ )

| Variables                                         | Years           |             |                 |             |                 |             |
|---------------------------------------------------|-----------------|-------------|-----------------|-------------|-----------------|-------------|
|                                                   | 2009            |             | 2013            |             | 2018            |             |
|                                                   | Statistics      |             |                 |             |                 |             |
|                                                   | M ( <i>SD</i> ) | Min-Max     | M ( <i>SD</i> ) | Min-Max     | M ( <i>SD</i> ) | Min-Max     |
| SII                                               | 4.92 (2.80)     | 0.80-17.70  | 3.43 (1.93)     | 0.60-12.40  | 2.79 (1.72)     | 0.50-11.90  |
| Unemployment rate                                 | 6.83 (2.00)     | 2.60-14.00  | 9.79 (2.33)     | 5.20-18.20  | 5.30 (1.98)     | 2.40-11.50  |
| Women’s rate with tertiary education <sup>a</sup> | 11.46 (4.77)    | 3.80-31.80  | ---             | ---         | ---             | ---         |
| Annual rate of investment in culture and sports   | 11.28 (5.86)    | 1.20-39.70  | 9.85 (6.09)     | 0.80-45.00  | 11.13 (4.89)    | 2.30-28.80  |
| Average number of students per computer           | 3.81 (1.84)     | 0.70-10.40  | 2.48 (1.26)     | 0.70-7.90   | 3.67 (1.63)     | 0.60-12.20  |
| Preschool enrollment rate                         | 88.75 (12.40)   | 44.10-100   | 92.42 (9.45)    | 58.80-100   | 92.55 (8.50)    | 56.90-100   |
| Secondary school enrollment rate                  | 61.81 (20.98)   | 1.30-100    | 65.44 (20.38)   | 1.00-100    | 69.99 (19.63)   | 5.40-100    |
| Permanent teachers’ rate                          | 72.47 (9.19)    | 45.30-92.90 | 78.21 (11.76)   | 15.40-96.40 | 77.07 (8.79)    | 28.60-93.00 |
| Conclusion rate by the end of secondary school    | 69.72 (11.16)   | 26.70-100   | 66.70 (10.58)   | 38.30-100   | 76.71 (9.12)    | 40.00-100   |

a. Indicator only available for 2011 (last national census)

*Note.* SII = Social inclusion income.

Descriptive statistics by type of municipality and mean comparisons between low- and high-density municipalities

| Variables                                         | Years              |             |                     |             |                          |                    |             |                     |             |                          |                    |             |                     |             |                          |
|---------------------------------------------------|--------------------|-------------|---------------------|-------------|--------------------------|--------------------|-------------|---------------------|-------------|--------------------------|--------------------|-------------|---------------------|-------------|--------------------------|
|                                                   | 2009 – Low density |             | 2009 – High density |             |                          | 2013 – Low density |             | 2013 – High density |             |                          | 2018 – Low density |             | 2018 – High density |             |                          |
|                                                   | Statistics         |             |                     |             |                          |                    |             |                     |             |                          |                    |             |                     |             |                          |
|                                                   | M ( <i>SD</i> )    | Min-<br>Max | M ( <i>SD</i> )     | Min-<br>Max | <i>F</i><br><i>ANOVA</i> | M ( <i>SD</i> )    | Min-<br>Max | M ( <i>SD</i> )     | Min-<br>Max | <i>F</i><br><i>ANOVA</i> | M ( <i>SD</i> )    | Min-<br>Max | M ( <i>SD</i> )     | Min-<br>Max | <i>F</i><br><i>ANOVA</i> |
| SII                                               | 5.37 (2.91)        | 0.80-17.70  | 4.37 (2.56)         | 1.20-13.60  | 8.09***                  | 3.66 (2.05)        | 0.60-12.40  | 3.15 (1.74)         | 0.70-10.40  | 4.46*                    | 3.16 (1.84)        | 0.60-11.90  | 2.32 (1.43)         | 0.50-9.60   | 15.78***                 |
| Unemployment rate                                 | 6.76 (2.01)        | 2.60-13.20  | 6.92 (2.00)         | 3.50-14.00  | .93                      | 9.82 (2.36)        | 5.20-18.20  | 9.76 (2.29)         | 5.80-16.80  | .04                      | 5.88 (2.10)        | 2.60-11.50  | 4.59 (1.55)         | 2.40-10.10  | 29.58***                 |
| Women’s rate with tertiary education <sup>a</sup> | 9.35 (3.30)        | 3.80-22.30  | 14.07 (5.03)        | 3.80-31.80  | 80.09***                 | ---                | ---         | ---                 | ---         | ---                      | ---                | ---         | ---                 | ---         | ---                      |
| Annual rate of investment in culture and sports   | 11.14 (5.95)       | 1.40-39.70  | 11.45 (5.78)        | 1.20-33.30  | .18                      | 9.84 (5.39)        | 0.90-32.80  | 9.85 (6.88)         | 0.80-45.00  | .00                      | 11.34 (5.00)       | 2.60-28.80  | 10.88 (4.76)        | 2.30-23.80  | .56                      |
| Average number of students per computer           | 3.26 (1.70)        | 0.70-10.40  | 4.50 (1.78)         | 1.60-10.30  | 31.50***                 | 2.14 (1.18)        | 0.70-7.60   | 2.90 (1.23)         | 1.20-7.90   | 25.20***                 | 3.05 (1.48)        | 0.60-12.20  | 4.43 (1.47)         | 1.90-10-10  | 54.62***                 |
| Preschool enrollment rate                         | 94.04 (8.03)       | 67.80-100   | 82.19 (13.70)       | 44.10-100   | 73.58***                 | 96.27 (5.87)       | 76.60-100   | 87.65 (10.80)       | 58.80-100   | 65.38***                 | 94.45 (6.45)       | 67.00-100   | 90.19 (10.03)       | 56.90-100   | 16.64***                 |
| Secondary school enrollment rate                  | 59.92 (21.14)      | 1.30-100    | 64.14 (20.63)       | 3.90-100    | 2.54                     | 64.17 (20.43)      | 1.00-100    | 67.01 (20.29)       | 16.90-100   | 1.21                     | 68.95 (19.71)      | 5.40-100    | 71.28 (19.55)       | 17.40-100   | .88                      |
| Permanent teachers’ rate                          | 71.72 (9.83)       | 45.30-92.90 | 73.39 (8.28)        | 48.00-90.00 | 2.09                     | 75.62 (12.98)      | 15.40-96.40 | 81.41 (9.11)        | 47.90-96.30 | 16.09***                 | 75.33 (10.60)      | 28.60-93.00 | 79.24 (5.09)        | 65.30-91.30 | 13.00***                 |
| Conclusion rate by the end of secondary school    | 69.43 (13.10)      | 26.70-100   | 70.09 (8.18)        | 45.30-90.20 | .22                      | 68.25 (11.49)      | 38.30-100   | 64.78 (9.00)        | 42.50-94.70 | 6.91**                   | 77.69 (9.82)       | 40-100      | 75.49 (8.04)        | 57.50-91.70 | 3.68                     |

a. Indicator only available for 2011 (last national census)

Note. SII = Social inclusion income.

# Bivariate correlations

|                                                    | 1.     | 2.     | 3.     | 4.     | 5.   | 6.     | 7.    | 8.    | 9.   | 10. |
|----------------------------------------------------|--------|--------|--------|--------|------|--------|-------|-------|------|-----|
| 1. Municipality type <sup>a</sup>                  | ---    |        |        |        |      |        |       |       |      |     |
| 2.SII                                              | -.17** | ---    |        |        |      |        |       |       |      |     |
| 3. Unemployment rate                               | -.07*  | .47**  | ---    |        |      |        |       |       |      |     |
| 4. Women's rate with tertiary education            | .42**  | -.01   | -.01   | ---    |      |        |       |       |      |     |
| 5. Annual rate of investment in culture and sports | -.01   | .02    | -.14** | .03    | ---  |        |       |       |      |     |
| 6. Average number of students per computer         | .33**  | .07    | -.17** | .14**  | .01  | ---    |       |       |      |     |
| 7. Preschool enrollment rate                       | -.39** | -.14** | -.01   | -.22** | .06  | -.24** | ---   |       |      |     |
| 8. Secondary school enrollment rate                | .07*   | -.06   | .02    | .26**  | .02  | .05    | .22** | ---   |      |     |
| 9. Permanent teachers' rate                        | .19**  | -.30** | -.09*  | .27**  | .04  | -.06   | .03   | .19** | ---  |     |
| 10. Secondary school completion rate               | .06    | -.14** | -.23** | -.08*  | .08* | .05    | .14** | .05   | -.06 | --- |

\* $p < .05$ ; \*\* $p < .01$

a. Variable coded as 0 = Low density and 1 = High density

Note. SII = Social inclusion income

### Models with SSI as baseline factor (Baseline Model 1)

|                  | Stat.   |
|------------------|---------|
| Baseline Model 1 |         |
| AIC              | 5741.62 |
| BIC              | 5764.74 |
| Model 1          |         |
| AIC              | 5700.79 |
| BIC              | 5728.62 |
| Model 2          |         |
| AIC              | 5742.74 |
| BIC              | 5770.48 |
| Model 3          |         |
| AIC              | 5740.81 |
| BIC              | 5773.8  |
| Model 4          |         |
| AIC              | 5739.81 |
| BIC              | 5767.55 |
| Model 5          |         |
| AIC              | 5733.96 |
| BIC              | 5761.70 |
| Model 6          |         |
| AIC              | 5731.08 |
| BIC              | 5763.44 |
| Model 7          |         |
| AIC              | 5739.86 |
| BIC              | 5767.70 |
| Model 8          |         |
| AIC              | 5740.68 |
| BIC              | 5773.05 |
| Model 9          |         |
| AIC              | 5733.84 |
| BIC              | 5770.83 |
| Model 10         |         |
| AIC              | 5727.18 |
| BIC              | 5768.79 |

### Notes

Model 1 - SSI; municipality type; unemployment rate

Model 2 - municipality type; SSI; rate of women with tertiary education.

Model 3 - municipality type; SSI; rate of women with tertiary education.; % of investment in culture and sports;

Model 4 - municipality type; SSI; % of investment in culture and sports;

Model 5 - municipality type; SSI; average of students by computer;

Model 6 - municipality type; SSI; average of students by computer; % of enrollement in early school;

Model 7 - municipality type; SSI; % of enrollement in early school;

Model 8 - municipality type; SSI; % of enrollement in early school; % of enrollement in secondary school;

Model 9 - municipality type; SSI; % of enrollement in early school; % of enrollement in secondary school; % of permanent teachers.

Model 10 - municipality type; SSI; average of students by computer; % of enrollement in early school; % of enrollement in secondary school; % of permanent teachers.

### Models with unemployment as key factor (baseline model 2)

|                  | Stat.          |
|------------------|----------------|
| Baseline Model 2 |                |
| AIC              | 5702.01        |
| BIC              | 5725.13        |
| Model 11         |                |
| AIC              | 5700.79        |
| BIC              | 5728.62        |
| Model 12         |                |
| AIC              | 5703.33        |
| BIC              | 5731.08        |
| Model 13         |                |
| AIC              | 5704.88        |
| BIC              | 5737.18        |
| Model 14         |                |
| AIC              | 5703.52        |
| BIC              | 5731.27        |
| Model 15         |                |
| AIC              | 5703.39        |
| BIC              | 5731.13        |
| Model 16         |                |
| AIC              | 5698.34        |
| BIC              | 5730.71        |
| Model 17         |                |
| AIC              | 5697.84        |
| BIC              | 5725.59        |
| Model 18         |                |
| AIC              | 5697.84        |
| BIC              | 5730.20        |
| <b>Model 19</b>  |                |
| <b>AIC</b>       | <b>5695.29</b> |
| <b>BIC</b>       | <b>5732.30</b> |
| Model 20         |                |
| AIC              | 5696.60        |
| BIC              | 5738.22        |

### Notes

Model 11 - SSI; municipality type; unemployment rate

Model 12 - municipality type; unemployment rate; rate of women with tertiary education.

Model 13 - municipality type; unemployment rate; rate of women with tertiary education.; % of investment in culture and sports;

Model 14 - municipality type; unemployment rate; % of investment in culture and sports;

Model 15 - municipality type; unemployment rate; average of students by computer;

Model 16 - municipality type; unemployment rate; average of students by computer; % of enrollement in early school;

Model 17 - municipality type; unemployment rate; % of enrollement in early school;

Model 18 - municipality type; unemployment rate; % of enrollement in early school; % of enrollement in secondary school;

Model 19 - municipality type; unemployment rate; % of enrollement in early school; % of enrollement in secondary school; % of permanent teachers.

Model 20 - municipality type; unemployment rate; average of students by computer; % of enrollement in early school; % of enrollement in secondary school; % of permanent teachers.

*In bold: selected model*

| <b>Models with SSI and unemployment as key factor (baseline model )</b> | <b>Stat.</b> |
|-------------------------------------------------------------------------|--------------|
| Baseline Model 3                                                        |              |
| AIC                                                                     | 5741.62      |
| BIC                                                                     | 5764.74      |
| Model 31                                                                |              |
| AIC                                                                     | 5700.79      |
| BIC                                                                     | 5728.62      |
| Model 32                                                                |              |
| AIC                                                                     | 5702.32      |
| BIC                                                                     | 5734.7       |
| Model 33                                                                |              |
| AIC                                                                     | 5703.62      |
| BIC                                                                     | 5740.61      |
| Model 34                                                                |              |
| AIC                                                                     | 5702.22      |
| BIC                                                                     | 5734.58      |
| Model 35                                                                |              |
| AIC                                                                     | 5701.26      |
| BIC                                                                     | 5733.63      |
| Model 36                                                                |              |
| AIC                                                                     | 5698.57      |
| BIC                                                                     | 5735.40      |
| Model 37                                                                |              |
| AIC                                                                     | 5698.63      |
| BIC                                                                     | 5731.00      |
| Model 38                                                                |              |
| AIC                                                                     | 5698.61      |
| BIC                                                                     | 5735.61      |
| Model 39                                                                |              |
| AIC                                                                     | 5694.25      |
| BIC                                                                     | 5735.87      |
| Model 40                                                                |              |
| AIC                                                                     | 5694.87      |
| BIC                                                                     | 5741.62      |

## Notes

Model 31 - SSI; municipality type; unemployment rate

Model 32 - SSI; municipality type; unemployment rate; rate of women with tertiary education.

Model 33 - SSI; municipality type; unemployment rate; rate of women with tertiary education.; % of investment in culture and sports;

Model 34 - SSI; municipality type; unemployment rate; % of investment in culture and sports;

Model 35 - SSI; municipality type; unemployment rate; average of students by computer;

Model 36 - SSI; municipality type; unemployment rate; average of students by computer; % of enrollement in early school;

Model 37 - SSI; municipality type; unemployment rate; % of enrollement in early school;

Model 38 - SSI; municipality type; unemployment rate; % of enrollement in early school; % of enrollement in secondary school;  
Model 39 - SSI; municipality type; unemployment rate; % of enrollement in early school; % of enrollement in secondary school;  
% of permanent teachers.

Model 40 - SSI; municipality type; unemployment rate; average of students by computer; % of enrollement in early school; % of enrollement in secondary school; % of permanent teachers.
